# Supplementary material for: ARTEMISININ BIOSYNTHESIS PROMOTING KINASE 1 positively regulates artemisinin biosynthesis through phosphorylating AabZIP1
Source: PubMed Central journal article supplement (PMC6019033; doi:10.1093/jxb/erx444), 2017-12-28
Supplement: erx444_suppl_supplementary_figures_s1-s7.pdf [file erx444_suppl_supplementary_figures_s1-s7.pdf]

Supplementary Table S1 Primers used in this study

| Primers                   | Sequence 5' -3'                | Purpose                |
|---------------------------|--------------------------------|------------------------|
| AaAPK1-qF1                | AGGAGCCCGATCAACCTATG           | qRT-PCR                |
| AaAPK1-qR1                | CAGAGTCAAAATCGTCCAGATC         |                        |
| AaADS-qF                  | AATGGGCAAATGAGGGACAC           | qRT-PCR                |
| AaADS-qR                  | TTTCAAGGCTCGATGAACTATG         |                        |
| AaCYP71AV1-qF             | CACCCTCCACTACCCTTG             | qRT-PCR                |
| AaCYP71AV1-qR             | GACACATCCTTCTCCCAGC            |                        |
| AaDBR2-qF                 | CTTGGGTTACAAGCTGTGGCTCAAG      | qRT-PCR                |
| AaDBR2-qR                 | ATATAATCAAACTAGAGGAGTGACC      |                        |
| AaALDH1-qF                | CAGTTTCTGACCCAAATCCAGTTGA      | qRT-PCR                |
| AaALDH1-qR                | TCGGAGTAGTTGGTCACAT            |                        |
| Aannua00085S022560-F-cacc | caccATGGATCGATTACCGGGGAT       | gateway pEntry cloning |
| Aannua00085S022560-R      | CATAGCATAAACGATTTTAC           |                        |
| Aannua17791S810490-F-cacc | caccATGGACAACAGATCTATGCT       | gateway pEntry cloning |
| Aannua17791S810490-R      | CATAGCGTATACAATCTCCC           |                        |
| Aannua14947S778390-F-cacc | caccATGGACAACAGATCTATGCTGAC    | gateway pEntry cloning |
| Aannua14947S778390-R      | TCGACACTCTGAGTCGGCTG           |                        |
| Aannua05209S490740-F-cacc | caccATGGACAAGTATGAGGTGGTAAAG   | gateway pEntry cloning |
| Aannua05209S490740-R      | ATCATCTTCTTCTGCTCCCC           |                        |
| Aannua02702S329990-F-cacc | caccATGGAGAAGTATGAGTTAGT       | gateway pEntry cloning |
| Aannua02702S329990-R      | TGGGATGGGCGGGATTTCTC           |                        |
| AaAPK1-F-cacc             | caccATGGATCGGAATATGAGTTC       | gateway pEntry cloning |
| AaAPK1-R                  | GATGGCGTATATGACCTCAC           |                        |
| AaAPK1-RI-cacc            | caccGTGGTTTCTGAAGAACTTAC       | gateway pEntry cloning |
| AaAPK1-RI-R               | GGGTCCAGTCTTTTTTCCAA           |                        |
| AaAPK1-F-EcoRI            | GCGAATTCATGGATCGGAATATGAGTTC   | Rrotein recombinant    |
| AaAPK1-R-XhoI             | GCCTCGAGGATGGCGTATATGACCTCAC   |                        |
| AabZIP1-F-EcoRI           | GCGAATTCATGAACAACAAGAATTTTGG   | Rrotein recombinant    |
| AabZIP1-R-XhoI            | GCCTCGAGCCATGGACCGAAAGTGTCT    |                        |
| AaABI1-F-EcoRI            | CGGAATTCATGGAAGATATCCCTCCTTCGG | Yeast two hybrid       |
| AaABI1-R-SacI             | CGGAGCTCGTCAAGATTTAGTTTTAAACC  |                        |
| AaSnRK2.2-F-BamHI         | GCGGATCCATGGATCGATTACCGGGGAT   | Yeast two hybrid       |
| AaSnRK2.2-R-SalI          | GCGTCGACCATAGCATAAACGATTTTAC   |                        |
| AaSnRK2.3-F-SalI          | GCGTCGACATGGACAACAGATCTATGCT   | Yeast two hybrid       |
| AaSnRK2.3-R-PstI          | GCCTGCAGCATAGCGTATACAATCTCCC   |                        |
| AaSnRK2.4-F-SalI          | GCGTCGACATGGACAACAGATCTATGCTGA | Yeast two hybrid       |
| AaSnRK2.4-R-PstI          | GCCTGCAGTCGACACTCTGAGTCGGCTG   |                        |
| AaSnRK2.5-F-SalI          | GCGTCGACATGGACAAGTATGAGGTGGTAA | Yeast two hybrid       |
| AaSnRK2.5-R-PstI          | GCCTGCAGATCATCTTCTTCTGCTCCCC   |                        |
| AaSnRK2.6-F-SalI          | GCGTCGACATGGAGAAGTATGAGTTAGT   | Yeast two hybrid       |
| AaSnRK2.6-R-PstI          | GCCTGCAGTGGGATGGGCGGGATTTCTC   |                        |
| AaAPK1-F-PstI             | GCCTGCAGATGGATCGGAATATGAGTTC   | Overexpression         |
| AaAPK1-R-BclI             | GCTGATCAGATGGCGTATATGACCTCAC   |                        |

```

AcSnRK2_7 .....MNRSLMTLVG.GMCMFIMHDSRVLVDKSGNFG.ARMRRCTNLEL.ARMRRCTNLEL.VRELNHR.HFHPNIRPFDVLT 69
AcSnRK2_2 .....MNRSLMTLVG.GMCMFIMHDSRVLVDKSGNFG.ARMRRCTNLEL.ARMRRCTNLEL.VRELNHR.HFHPNIRPFDVLT 68
AcSnRK2_3 .....MNRSLMTLVG.GMCMFIMHDSRVLVDKSGNFG.ARMRRCTNLEL.ARMRRCTNLEL.VRELNHR.HFHPNIRPFDVLT 87
Ammu149475778390 .....MNRSLMTLVG.GMCMFIMHDSRVLVDKSGNFG.ARMRRCTNLEL.ARMRRCTNLEL.VRELNHR.HFHPNIRPFDVLT 89
AaFAK1 .....MNRSLMTLVG.GMCMFIMHDSRVLVDKSGNFG.ARMRRCTNLEL.ARMRRCTNLEL.VRELNHR.HFHPNIRPFDVLT 86
AcSnRK2_6 .....MNRSLMTLVG.GMCMFIMHDSRVLVDKSGNFG.ARMRRCTNLEL.ARMRRCTNLEL.VRELNHR.HFHPNIRPFDVLT 84
Ammu00805022560 .....MNRSLMTLVG.GMCMFIMHDSRVLVDKSGNFG.ARMRRCTNLEL.ARMRRCTNLEL.VRELNHR.HFHPNIRPFDVLT 87
Ammu17915810490 .....MNRSLMTLVG.GMCMFIMHDSRVLVDKSGNFG.ARMRRCTNLEL.ARMRRCTNLEL.VRELNHR.HFHPNIRPFDVLT 89
OsSAPK9 .....MAAAGAGAGAPF.AALTVGF.GMCMFIMHDSRVLVDKSGNFG.ARMRRCTNLEL.ARMRRCTNLEL.VRELNHR.HFHPNIRPFDVLT 98
AcSnRK2_1 .....MNRSLMTLVG.GMCMFIMHDSRVLVDKSGNFG.ARMRRCTNLEL.ARMRRCTNLEL.VRELNHR.HFHPNIRPFDVLT 69
OsSAPK9 .....MNRSLMTLVG.GMCMFIMHDSRVLVDKSGNFG.ARMRRCTNLEL.ARMRRCTNLEL.VRELNHR.HFHPNIRPFDVLT 87
OsSAPK10 .....MNRSLMTLVG.GMCMFIMHDSRVLVDKSGNFG.ARMRRCTNLEL.ARMRRCTNLEL.VRELNHR.HFHPNIRPFDVLT 88
AcSnRK2_8 .....MNRSLMTLVG.GMCMFIMHDSRVLVDKSGNFG.ARMRRCTNLEL.ARMRRCTNLEL.VRELNHR.HFHPNIRPFDVLT 69
OsSAPK1 .....MNRSLMTLVG.GMCMFIMHDSRVLVDKSGNFG.ARMRRCTNLEL.ARMRRCTNLEL.VRELNHR.HFHPNIRPFDVLT 69
OsSAPK2 .....MNRSLMTLVG.GMCMFIMHDSRVLVDKSGNFG.ARMRRCTNLEL.ARMRRCTNLEL.VRELNHR.HFHPNIRPFDVLT 69
OsSAPK3 .....MNRSLMTLVG.GMCMFIMHDSRVLVDKSGNFG.ARMRRCTNLEL.ARMRRCTNLEL.VRELNHR.HFHPNIRPFDVLT 70
AcSnRK2_9 .....MNRSLMTLVG.GMCMFIMHDSRVLVDKSGNFG.ARMRRCTNLEL.ARMRRCTNLEL.VRELNHR.HFHPNIRPFDVLT 69
OsSAPK5 .....MNRSLMTLVG.GMCMFIMHDSRVLVDKSGNFG.ARMRRCTNLEL.ARMRRCTNLEL.VRELNHR.HFHPNIRPFDVLT 69
OsSAPK4 .....MNRSLMTLVG.GMCMFIMHDSRVLVDKSGNFG.ARMRRCTNLEL.ARMRRCTNLEL.VRELNHR.HFHPNIRPFDVLT 69
OsSAPK6 .....MNRSLMTLVG.GMCMFIMHDSRVLVDKSGNFG.ARMRRCTNLEL.ARMRRCTNLEL.VRELNHR.HFHPNIRPFDVLT 69
OsSAPK7 .....MNRSLMTLVG.GMCMFIMHDSRVLVDKSGNFG.ARMRRCTNLEL.ARMRRCTNLEL.VRELNHR.HFHPNIRPFDVLT 69
AcSnRK2_5 .....MNRSLMTLVG.GMCMFIMHDSRVLVDKSGNFG.ARMRRCTNLEL.ARMRRCTNLEL.VRELNHR.HFHPNIRPFDVLT 69
AcSnRK2_4 .....MNRSLMTLVG.GMCMFIMHDSRVLVDKSGNFG.ARMRRCTNLEL.ARMRRCTNLEL.VRELNHR.HFHPNIRPFDVLT 69
AcSnRK2_10 .....MNRSLMTLVG.GMCMFIMHDSRVLVDKSGNFG.ARMRRCTNLEL.ARMRRCTNLEL.VRELNHR.HFHPNIRPFDVLT 69
Ammu027025329990 .....MNRSLMTLVG.GMCMFIMHDSRVLVDKSGNFG.ARMRRCTNLEL.ARMRRCTNLEL.VRELNHR.HFHPNIRPFDVLT 83
Ammu052095490740 .....MNRSLMTLVG.GMCMFIMHDSRVLVDKSGNFG.ARMRRCTNLEL.ARMRRCTNLEL.VRELNHR.HFHPNIRPFDVLT 69
Consensus
y g nqf a l a k i t q id v rei nhr l hpl r f e t

AcSnRK2_7 .....FHHAIWDAAGGELIRGNSGASGSD.....PREFQISGVYCSMCHRDLEL.LDGSFAFFKICDFGYSK..... 148
AcSnRK2_2 .....FHHAIWDAAGGELIRGNSGASGSD.....PREFQISGVYCSMCHRDLEL.LDGSFAFFKICDFGYSK.....V 168
AcSnRK2_3 .....FHHAIWDAAGGELIRGNSGASGSD.....PREFQISGVYCSMCHRDLEL.LDGSFAFFKICDFGYSK..... 166
Ammu149475778390 .....FHHAIWDAAGGELIRGNSGASGSD.....PREFQISGVYCSMCHRDLEL.LDGSFAFFKICDFGYSK..... 161
AaFAK1 .....FHHAIWDAAGGELIRGNSGASGSD.....PREFQISGVYCSMCHRDLEL.LDGSFAFFKICDFGYSK..... 165
AcSnRK2_6 .....FHHAIWDAAGGELIRGNSGASGSD.....PREFQISGVYCSMCHRDLEL.LDGSFAFFKICDFGYSK..... 165
Ammu00805022560 .....FHHAIWDAAGGELIRGNSGASGSD.....PREFQISGVYCSMCHRDLEL.LDGSFAFFKICDFGYSK..... 166
Ammu17915810490 .....FHHAIWDAAGGELIRGNSGASGSD.....PREFQISGVYCSMCHRDLEL.LDGSFAFFKICDFGYSK..... 168
OsSAPK9 .....FHHAIWDAAGGELIRGNSGASGSD.....PREFQISGVYCSMCHRDLEL.LDGSFAFFKICDFGYSK..... 177
AcSnRK2_1 .....FHHAIWDAAGGELIRGNSGASGSD.....PREFQISGVYCSMCHRDLEL.LDGSFAFFKICDFGYSK..... 148
OsSAPK9 .....FHHAIWDAAGGELIRGNSGASGSD.....PREFQISGVYCSMCHRDLEL.LDGSFAFFKICDFGYSK..... 166
AcSnRK2_8 .....FHHAIWDAAGGELIRGNSGASGSD.....PREFQISGVYCSMCHRDLEL.LDGSFAFFKICDFGYSK..... 167
OsSAPK1 .....FHHAIWDAAGGELIRGNSGASGSD.....PREFQISGVYCSMCHRDLEL.LDGSFAFFKICDFGYSK..... 148
OsSAPK2 .....FHHAIWDAAGGELIRGNSGASGSD.....PREFQISGVYCSMCHRDLEL.LDGSFAFFKICDFGYSK..... 148
OsSAPK3 .....FHHAIWDAAGGELIRGNSGASGSD.....PREFQISGVYCSMCHRDLEL.LDGSFAFFKICDFGYSK..... 149
AcSnRK2_9 .....FHHAIWDAAGGELIRGNSGASGSD.....PREFQISGVYCSMCHRDLEL.LDGSFAFFKICDFGYSK..... 148
OsSAPK5 .....FHHAIWDAAGGELIRGNSGASGSD.....PREFQISGVYCSMCHRDLEL.LDGSFAFFKICDFGYSK..... 148
OsSAPK4 .....FHHAIWDAAGGELIRGNSGASGSD.....PREFQISGVYCSMCHRDLEL.LDGSFAFFKICDFGYSK..... 148
OsSAPK6 .....FHHAIWDAAGGELIRGNSGASGSD.....PREFQISGVYCSMCHRDLEL.LDGSFAFFKICDFGYSK..... 148
OsSAPK7 .....FHHAIWDAAGGELIRGNSGASGSD.....PREFQISGVYCSMCHRDLEL.LDGSFAFFKICDFGYSK..... 148
AcSnRK2_5 .....FHHAIWDAAGGELIRGNSGASGSD.....PREFQISGVYCSMCHRDLEL.LDGSFAFFKICDFGYSK..... 148
AcSnRK2_4 .....FHHAIWDAAGGELIRGNSGASGSD.....PREFQISGVYCSMCHRDLEL.LDGSFAFFKICDFGYSK..... 156
AcSnRK2_10 .....FHHAIWDAAGGELIRGNSGASGSD.....PREFQISGVYCSMCHRDLEL.LDGSFAFFKICDFGYSK..... 148
FHHAIWDAAGGELIRGNSGASGSD.....PREFQISGVYCSMCHRDLEL.LDGSFAFFKICDFGYSK..... 148
Ammu052095490740 .....FHHAIWDAAGGELIRGNSGASGSD.....PREFQISGVYCSMCHRDLEL.LDGSFAFFKICDFGYSK..... 148
Consensus
h se a ggel i r f e e f f q l gv h chrdklen ldgs kicdfgysk

AcSnRK2_7 .....S.LHSPFSSVGTGFANAPPVLLRQEMGSDVWVSCGVLYVLMVYVPEFIDGFRFRFQIAGLWVSGEYVHISPCGDRSRIFV 242
AcSnRK2_2 .....S.LHSPFSSVGTGFANAPPVLLRQEMGSDVWVSCGVLYVLMVYVPEFIDGFRFRFQIAGLWVSGEYVHISPCGDRSRIFV 268
AcSnRK2_3 .....S.LHSPFSSVGTGFANAPPVLLRQEMGSDVWVSCGVLYVLMVYVPEFIDGFRFRFQIAGLWVSGEYVHISPCGDRSRIFV 260
Ammu149475778390 .....S.LHSPFSSVGTGFANAPPVLLRQEMGSDVWVSCGVLYVLMVYVPEFIDGFRFRFQIAGLWVSGEYVHISPCGDRSRIFV 281
AaFAK1 .....S.LHSPFSSVGTGFANAPPVLLRQEMGSDVWVSCGVLYVLMVYVPEFIDGFRFRFQIAGLWVSGEYVHISPCGDRSRIFV 259
AcSnRK2_6 .....S.LHSPFSSVGTGFANAPPVLLRQEMGSDVWVSCGVLYVLMVYVPEFIDGFRFRFQIAGLWVSGEYVHISPCGDRSRIFV 259
Ammu00805022560 .....S.LHSPFSSVGTGFANAPPVLLRQEMGSDVWVSCGVLYVLMVYVPEFIDGFRFRFQIAGLWVSGEYVHISPCGDRSRIFV 260
Ammu17915810490 .....S.LHSPFSSVGTGFANAPPVLLRQEMGSDVWVSCGVLYVLMVYVPEFIDGFRFRFQIAGLWVSGEYVHISPCGDRSRIFV 262
OsSAPK9 .....S.LHSPFSSVGTGFANAPPVLLRQEMGSDVWVSCGVLYVLMVYVPEFIDGFRFRFQIAGLWVSGEYVHISPCGDRSRIFV 271
AcSnRK2_1 .....S.LHSPFSSVGTGFANAPPVLLRQEMGSDVWVSCGVLYVLMVYVPEFIDGFRFRFQIAGLWVSGEYVHISPCGDRSRIFV 260
OsSAPK9 .....S.LHSPFSSVGTGFANAPPVLLRQEMGSDVWVSCGVLYVLMVYVPEFIDGFRFRFQIAGLWVSGEYVHISPCGDRSRIFV 260
OsSAPK10 .....S.LHSPFSSVGTGFANAPPVLLRQEMGSDVWVSCGVLYVLMVYVPEFIDGFRFRFQIAGLWVSGEYVHISPCGDRSRIFV 261
AcSnRK2_8 .....S.LHSPFSSVGTGFANAPPVLLRQEMGSDVWVSCGVLYVLMVYVPEFIDGFRFRFQIAGLWVSGEYVHISPCGDRSRIFV 242
OsSAPK1 .....S.LHSPFSSVGTGFANAPPVLLRQEMGSDVWVSCGVLYVLMVYVPEFIDGFRFRFQIAGLWVSGEYVHISPCGDRSRIFV 242
OsSAPK2 .....S.LHSPFSSVGTGFANAPPVLLRQEMGSDVWVSCGVLYVLMVYVPEFIDGFRFRFQIAGLWVSGEYVHISPCGDRSRIFV 243
OsSAPK3 .....S.LHSPFSSVGTGFANAPPVLLRQEMGSDVWVSCGVLYVLMVYVPEFIDGFRFRFQIAGLWVSGEYVHISPCGDRSRIFV 243
AcSnRK2_9 .....S.LHSPFSSVGTGFANAPPVLLRQEMGSDVWVSCGVLYVLMVYVPEFIDGFRFRFQIAGLWVSGEYVHISPCGDRSRIFV 242
OsSAPK5 .....S.LHSPFSSVGTGFANAPPVLLRQEMGSDVWVSCGVLYVLMVYVPEFIDGFRFRFQIAGLWVSGEYVHISPCGDRSRIFV 242
OsSAPK4 .....S.LHSPFSSVGTGFANAPPVLLRQEMGSDVWVSCGVLYVLMVYVPEFIDGFRFRFQIAGLWVSGEYVHISPCGDRSRIFV 242
OsSAPK6 .....S.LHSPFSSVGTGFANAPPVLLRQEMGSDVWVSCGVLYVLMVYVPEFIDGFRFRFQIAGLWVSGEYVHISPCGDRSRIFV 242
OsSAPK7 .....S.LHSPFSSVGTGFANAPPVLLRQEMGSDVWVSCGVLYVLMVYVPEFIDGFRFRFQIAGLWVSGEYVHISPCGDRSRIFV 242
AcSnRK2_5 .....S.LHSPFSSVGTGFANAPPVLLRQEMGSDVWVSCGVLYVLMVYVPEFIDGFRFRFQIAGLWVSGEYVHISPCGDRSRIFV 242
AcSnRK2_4 .....S.LHSPFSSVGTGFANAPPVLLRQEMGSDVWVSCGVLYVLMVYVPEFIDGFRFRFQIAGLWVSGEYVHISPCGDRSRIFV 250
AcSnRK2_10 .....S.LHSPFSSVGTGFANAPPVLLRQEMGSDVWVSCGVLYVLMVYVPEFIDGFRFRFQIAGLWVSGEYVHISPCGDRSRIFV 242
Ammu027025329990 .....S.LHSPFSSVGTGFANAPPVLLRQEMGSDVWVSCGVLYVLMVYVPEFIDGFRFRFQIAGLWVSGEYVHISPCGDRSRIFV 256
Ammu052095490740 .....S.LHSPFSSVGTGFANAPPVLLRQEMGSDVWVSCGVLYVLMVYVPEFIDGFRFRFQIAGLWVSGEYVHISPCGDRSRIFV 242
Consensus
s l h s p f s s v g t g f a n a p p v l l r q e m g s d v w v s c g v l y v l m v y v p e f i d g f r f r f q i a g l w v s g e y v h i s p c g d r s r i f v

AcSnRK2_7 .....ADGKRIVIEELKFWELRQEMGSDVWVSCGVLYVLMVYVPEFIDGFRFRFQIAGLWVSGEYVHISPCGDRSRIFV 327
AcSnRK2_2 .....ADGKRIVIEELKFWELRQEMGSDVWVSCGVLYVLMVYVPEFIDGFRFRFQIAGLWVSGEYVHISPCGDRSRIFV 347
AcSnRK2_3 .....ADGKRIVIEELKFWELRQEMGSDVWVSCGVLYVLMVYVPEFIDGFRFRFQIAGLWVSGEYVHISPCGDRSRIFV 339
Ammu149475778390 .....ADGKRIVIEELKFWELRQEMGSDVWVSCGVLYVLMVYVPEFIDGFRFRFQIAGLWVSGEYVHISPCGDRSRIFV 355
AaFAK1 .....ADGKRIVIEELKFWELRQEMGSDVWVSCGVLYVLMVYVPEFIDGFRFRFQIAGLWVSGEYVHISPCGDRSRIFV 332
AcSnRK2_6 .....ADGKRIVIEELKFWELRQEMGSDVWVSCGVLYVLMVYVPEFIDGFRFRFQIAGLWVSGEYVHISPCGDRSRIFV 338
Ammu00805022560 .....ADGKRIVIEELKFWELRQEMGSDVWVSCGVLYVLMVYVPEFIDGFRFRFQIAGLWVSGEYVHISPCGDRSRIFV 338
Ammu17915810490 .....ADGKRIVIEELKFWELRQEMGSDVWVSCGVLYVLMVYVPEFIDGFRFRFQIAGLWVSGEYVHISPCGDRSRIFV 340
OsSAPK9 .....ADGKRIVIEELKFWELRQEMGSDVWVSCGVLYVLMVYVPEFIDGFRFRFQIAGLWVSGEYVHISPCGDRSRIFV 349
AcSnRK2_1 .....ADGKRIVIEELKFWELRQEMGSDVWVSCGVLYVLMVYVPEFIDGFRFRFQIAGLWVSGEYVHISPCGDRSRIFV 320
OsSAPK9 .....ADGKRIVIEELKFWELRQEMGSDVWVSCGVLYVLMVYVPEFIDGFRFRFQIAGLWVSGEYVHISPCGDRSRIFV 339
OsSAPK10 .....ADGKRIVIEELKFWELRQEMGSDVWVSCGVLYVLMVYVPEFIDGFRFRFQIAGLWVSGEYVHISPCGDRSRIFV 340
AcSnRK2_8 .....ADGKRIVIEELKFWELRQEMGSDVWVSCGVLYVLMVYVPEFIDGFRFRFQIAGLWVSGEYVHISPCGDRSRIFV 318
OsSAPK1 .....ADGKRIVIEELKFWELRQEMGSDVWVSCGVLYVLMVYVPEFIDGFRFRFQIAGLWVSGEYVHISPCGDRSRIFV 323
OsSAPK2 .....ADGKRIVIEELKFWELRQEMGSDVWVSCGVLYVLMVYVPEFIDGFRFRFQIAGLWVSGEYVHISPCGDRSRIFV 322
OsSAPK3 .....ADGKRIVIEELKFWELRQEMGSDVWVSCGVLYVLMVYVPEFIDGFRFRFQIAGLWVSGEYVHISPCGDRSRIFV 312
AcSnRK2_9 .....ADGKRIVIEELKFWELRQEMGSDVWVSCGVLYVLMVYVPEFIDGFRFRFQIAGLWVSGEYVHISPCGDRSRIFV 323
OsSAPK5 .....ADGKRIVIEELKFWELRQEMGSDVWVSCGVLYVLMVYVPEFIDGFRFRFQIAGLWVSGEYVHISPCGDRSRIFV 336
OsSAPK4 .....ADGKRIVIEELKFWELRQEMGSDVWVSCGVLYVLMVYVPEFIDGFRFRFQIAGLWVSGEYVHISPCGDRSRIFV 321
OsSAPK6 .....ADGKRIVIEELKFWELRQEMGSDVWVSCGVLYVLMVYVPEFIDGFRFRFQIAGLWVSGEYVHISPCGDRSRIFV 324
OsSAPK7 .....ADGKRIVIEELKFWELRQEMGSDVWVSCGVLYVLMVYVPEFIDGFRFRFQIAGLWVSGEYVHISPCGDRSRIFV 324
AcSnRK2_5 .....ADGKRIVIEELKFWELRQEMGSDVWVSCGVLYVLMVYVPEFIDGFRFRFQIAGLWVSGEYVHISPCGDRSRIFV 322
AcSnRK2_4 .....ADGKRIVIEELKFWELRQEMGSDVWVSCGVLYVLMVYVPEFIDGFRFRFQIAGLWVSGEYVHISPCGDRSRIFV 330
AcSnRK2_10 .....ADGKRIVIEELKFWELRQEMGSDVWVSCGVLYVLMVYVPEFIDGFRFRFQIAGLWVSGEYVHISPCGDRSRIFV 322
Ammu027025329990 .....ADGKRIVIEELKFWELRQEMGSDVWVSCGVLYVLMVYVPEFIDGFRFRFQIAGLWVSGEYVHISPCGDRSRIFV 336
Ammu052095490740 .....ADGKRIVIEELKFWELRQEMGSDVWVSCGVLYVLMVYVPEFIDGFRFRFQIAGLWVSGEYVHISPCGDRSRIFV 320
Consensus
e d l l s d c c l d i s s g e i v y a l

AcSnRK2_7 .....EDLSDCCLDISSGEIVYAL..... 350
AcSnRK2_2 .....EDLSDCCLDISSGEIVYAL..... 369
AcSnRK2_3 .....EDLSDCCLDISSGEIVYAL..... 361
Ammu149475778390 .....EDLSDCCLDISSGEIVYAL..... 357
AaFAK1 .....EDLSDCCLDISSGEIVYAL..... 355
AcSnRK2_6 .....EDLSDCCLDISSGEIVYAL..... 362
Ammu00805022560 .....EDLSDCCLDISSGEIVYAL..... 361
Ammu17915810490 .....EDLSDCCLDISSGEIVYAL..... 363
OsSAPK9 .....EDLSDCCLDISSGEIVYAL..... 371
AcSnRK2_1 .....EDLSDCCLDISSGEIVYAL..... 362
OsSAPK9 .....EDLSDCCLDISSGEIVYAL..... 361
OsSAPK10 .....EDLSDCCLDISSGEIVYAL..... 362
AcSnRK2_8 .....EDLSDCCLDISSGEIVYAL..... 343
OsSAPK1 .....EDLSDCCLDISSGEIVYAL..... 339
OsSAPK2 .....EDLSDCCLDISSGEIVYAL..... 339
OsSAPK3 .....EDLSDCCLDISSGEIVYAL..... 334
AcSnRK2_9 .....EDLSDCCLDISSGEIVYAL..... 339
OsSAPK5 .....EDLSDCCLDISSGEIVYAL..... 370
OsSAPK4 .....EDLSDCCLDISSGEIVYAL..... 360
OsSAPK6 .....EDLSDCCLDISSGEIVYAL..... 365
OsSAPK7 .....EDLSDCCLDISSGEIVYAL..... 359
AcSnRK2_5 .....EDLSDCCLDISSGEIVYAL..... 365
AcSnRK2_4 .....EDLSDCCLDISSGEIVYAL..... 361
AcSnRK2_10 .....EDLSDCCLDISSGEIVYAL..... 374
Ammu027025329990 .....EDLSDCCLDISSGEIVYAL..... 361
Ammu052095490740 .....EDLSDCCLDISSGEIVYAL..... 370
Consensus
e d l s d c c l d i s s g e i v y a l

```

Fig. S1 Alignment of six SnRK2s kinase family candidates with SnRK2S family members from *Arabidopsis* and Rice.

|                  |  | <b>ATP binding loop</b>                                                        |     |
|------------------|--|--------------------------------------------------------------------------------|-----|
| AaAPK1           |  | MDNM...SSPGMDFIMHSDRYDQVVDIGSGNFGVARLMDQTEELVAVKYIERGSKIDENVREIINHRSLRHFNIV    | 78  |
| AtSnRK2.2        |  | MDPAINSPIMEDDFIMHSDRYDQVVDIGSGNFGVARLMDQTEELVAVKYIERGSKIDENVREIINHRSLRHFNIV    | 80  |
| AtSnRK2.3        |  | MDPAP.VITGDFDFIMHSDRYDQVVDIGSGNFGVARLMDQTEELVAVKYIERGSKIDENVREIINHRSLRHFNIV    | 79  |
| AtSnRK2.6_(OST1) |  | MDREA..VSGEMDFIMHSDRYDQVVDIGSGNFGVARLMDQTEELVAVKYIERGSKIDENVREIINHRSLRHFNIV    | 78  |
| Consensus        |  |                                                                                |     |
| AaAPK1           |  | RFEEILTFHHLAIMMEYASGGELFERICNAGRFDEARFFFQQLISGVSYCHMCHROLKIENTLLDGSFAPRLKI     | 158 |
| AtSnRK2.2        |  | RFEEILTFHHLAIMMEYASGGELFERICNAGRFDEARFFFQQLISGVSYCHMCHROLKIENTLLDGSFAPRLKI     | 160 |
| AtSnRK2.3        |  | RFEEILTFHHLAIMMEYASGGELFERICNAGRFDEARFFFQQLISGVSYCHMCHROLKIENTLLDGSFAPRLKI     | 159 |
| AtSnRK2.6_(OST1) |  | RFEEILTFHHLAIMMEYASGGELFERICNAGRFDEARFFFQQLISGVSYCHMCHROLKIENTLLDGSFAPRLKI     | 158 |
| Consensus        |  |                                                                                |     |
|                  |  | <b>Activation loop</b>                                                         |     |
| AaAPK1           |  | CDFGYS.....KSSVLHSQFRSTVGTPAVIAPPELLRGEYDGRADVWSCGVTLVYVLMGAYFFEDPEERDVRKTIH   | 231 |
| AtSnRK2.2        |  | CDFGYSKVLFIISKSSVLHSQFRSTVGTPAVIAPPELLRGEYDGRADVWSCGVTLVYVLMGAYFFEDPEERDVRKTIQ | 240 |
| AtSnRK2.3        |  | CDFGYS.....KSSVLHSQFRSTVGTPAVIAPPELLRGEYDGRADVWSCGVTLVYVLMGAYFFEDPEERDVRKTIQ   | 232 |
| AtSnRK2.6_(OST1) |  | CDFGYS.....KSSVLHSQFRSTVGTPAVIAPPELLRGEYDGRADVWSCGVTLVYVLMGAYFFEDPEERDVRKTIH   | 231 |
| Consensus        |  |                                                                                |     |
| AaAPK1           |  | RILNVCYPIEDENICISPECHLISRIFVDEPARITLREITSDQWFLKNLHGLMDENRNGS.QFQEPQEQSLDTIMQ   | 311 |
| AtSnRK2.2        |  | RILNVCYPIEDENICISPECHLISRIFVDEPARITLREITSDQWFLKNLHGLMDENRNGS.QFQEPQEQSLDTIMQ   | 319 |
| AtSnRK2.3        |  | RILNVCYPIEDENICISPECHLISRIFVDEPARITLREITSDQWFLKNLHGLMDENRNGS.QFQEPQEQSLDTIMQ   | 311 |
| AtSnRK2.6_(OST1) |  | RILNVCYPIEDENICISPECHLISRIFVDEPARITLREITSDQWFLKNLHGLMDENRNGS.QFQEPQEQSLDTIMQ   | 310 |
| Consensus        |  |                                                                                |     |
| AaAPK1           |  | IIEEATVPEWGLYD.....DMDDDLIDDESDEIDNDSSGEIVYA                                   | 354 |
| AtSnRK2.2        |  | IIEEATVETWRNRGDDDFMADNIDLDD.MDDDESE.SEIDNDSSGEIVYA                             | 368 |
| AtSnRK2.3        |  | IIEEATVPEWRNRGDDDFMADNIDLDD.MDDDESE.SEIDNDSSGEIVYA                             | 360 |
| AtSnRK2.6_(OST1) |  | IIEEATVPEAGIQNHLYLGSIDDDMEEDDESDDDDNDSSGEIVYA                                  | 361 |
| Consensus        |  |                                                                                |     |
|                  |  | <b>ABA box</b>                                                                 |     |

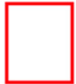

**PP2C interface residues**

Fig. S2 Alignment AaAPK1 with SnRK2.2/2.3/2.6 from *Arabidopsis*. The under the red line represented the conserved ATP binding loop in SnRK2s family; the sequences under the purple line represented the activation loop in SnRK2s family; the sequences in the red box represented the amino acid residues for PP2C interface; the sequences in the blue box represented the domain for ABA response.

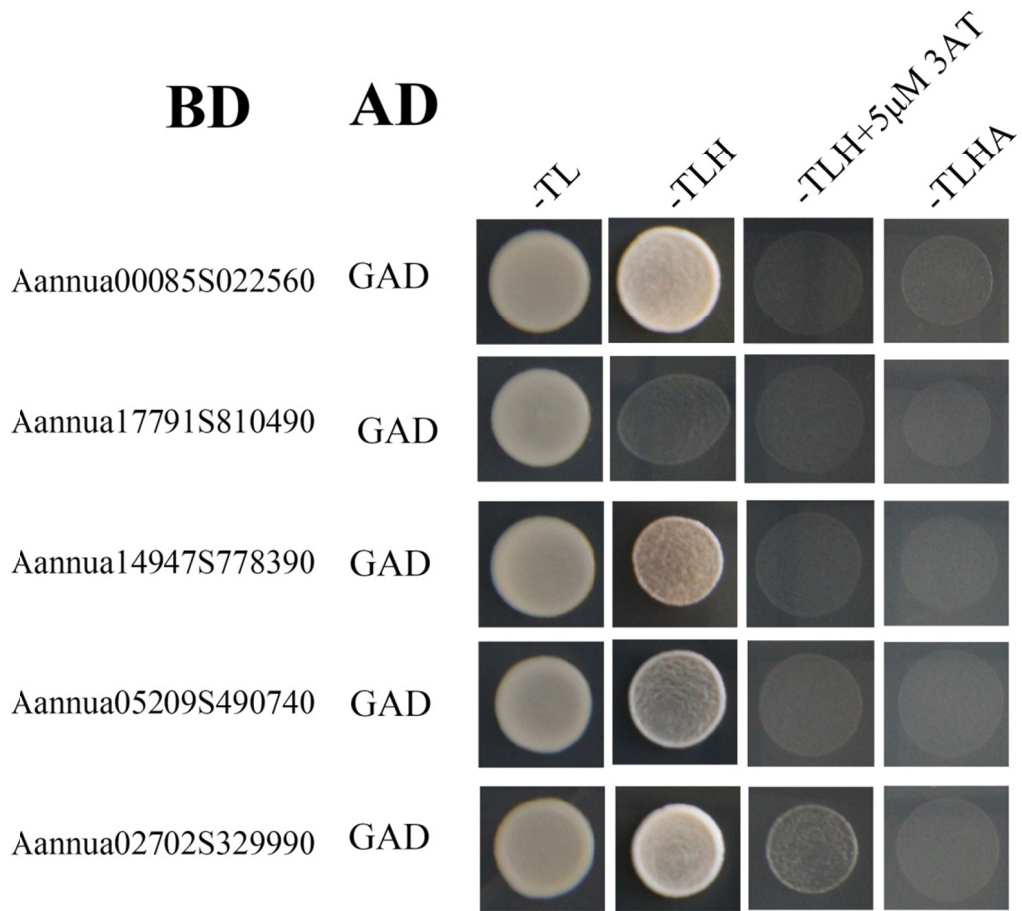

Fig. S3 The self-activation test of six kinase candidates in Y2H assay. The BD represented the candidate genes cloned into pGBKT7 vector, while the GAD represented the empty pGADT7 vector. -TL: synthetic medium dropout threonine and histidine; -TLH: synthetic medium drop out threonine, leucine and histidine; -TLHA: synthetic medium dropout threonine, leucine, histidine and adenosine.

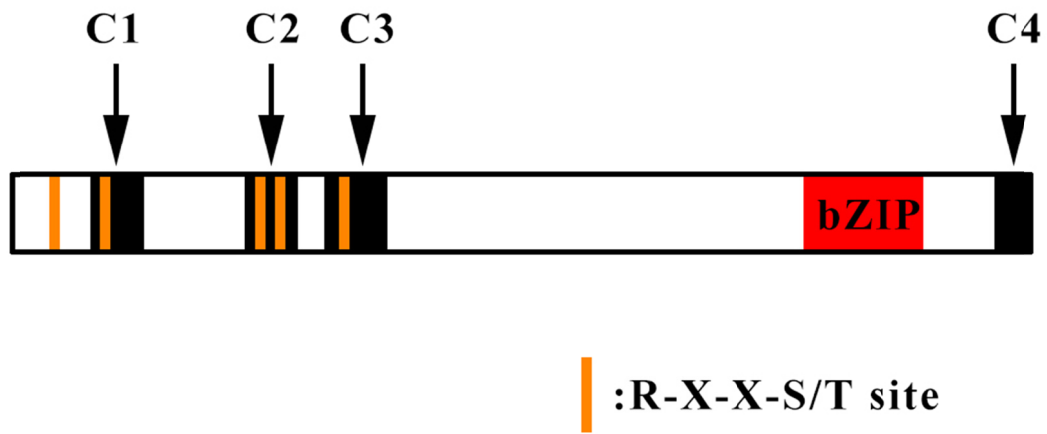

Fig. S4 The Schemes of putative SnRk2 type kinase target in AabZIP1. The yellow histogram represent the R-X-X-S/T site in AabZIP1.

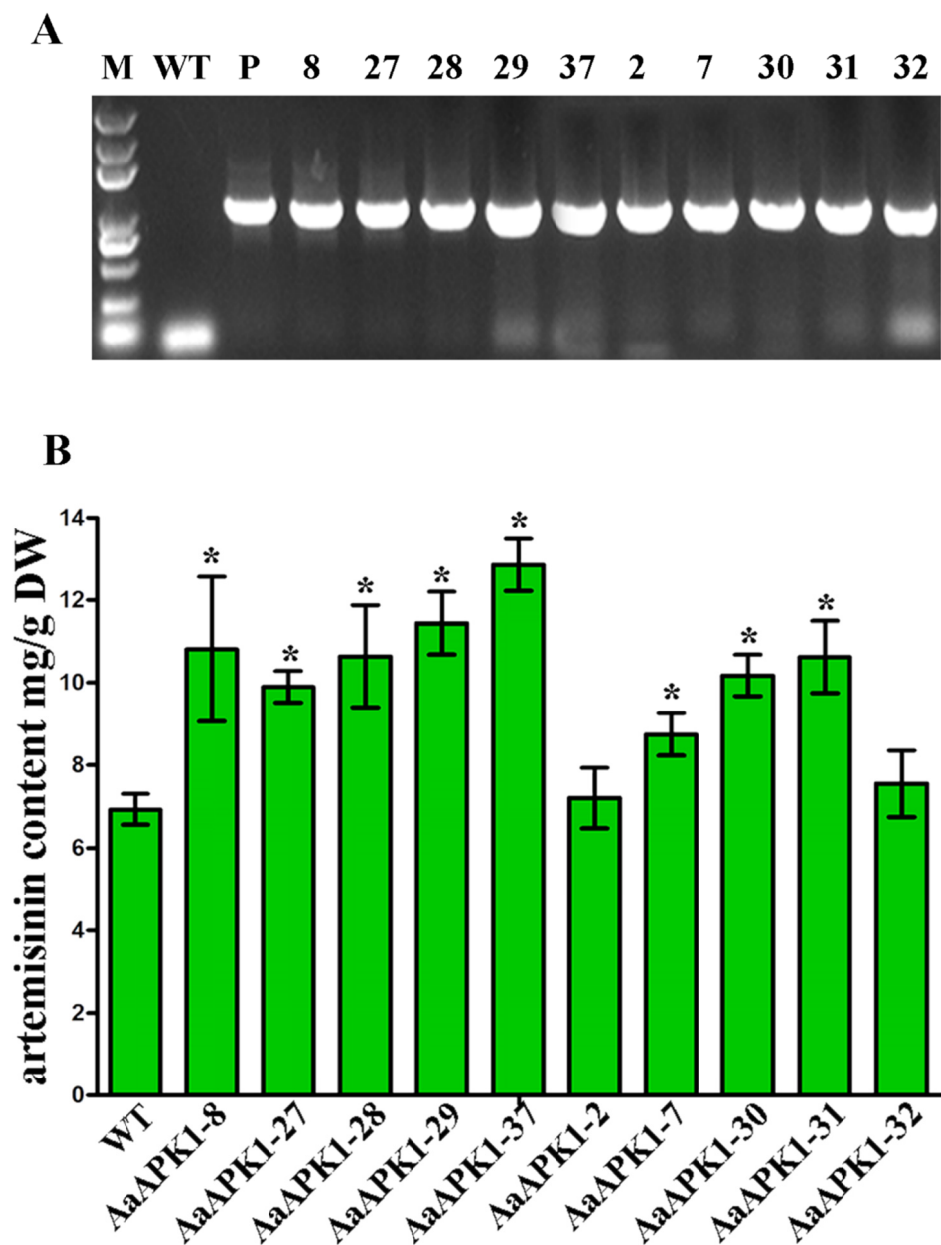

Fig. S5 The PCR detection of positive *AaAPK1* overexpression *Artemisia* and artemisinin contents analysis of 10 independent transgenic *Artemisia*. A, The PCR detection of positive transgenic *Artemisia* using genomic DNA. M: marker; WT: wild type *Artemisia*, used as negative control; P: PHB-*AaAPK1* plasmid, used as positive control. B: the artemisinin contents in *AaAPK1*-overexpressing and wild type *Artemisia*. WT: wild-type *A. annua* plants. \*: significant difference at the level of  $p < 0.05$  given by t-test. Error bars represent  $\pm$ SD (n=3).

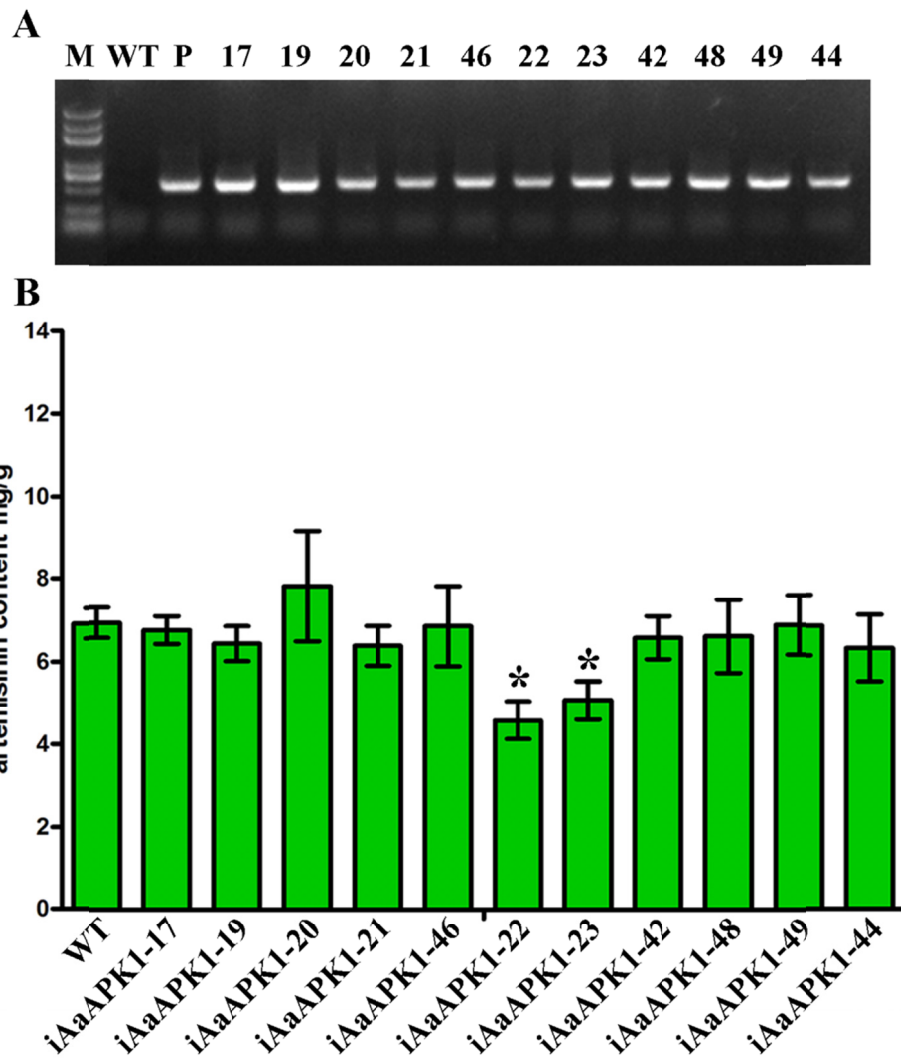

Fig. S6 The PCR detection of positive AaAPK1-RNAi *Artemisia* and artemisinin contents analysis of 10 independent AaAPK1-RNAi *Artemisia*. A, The PCR detection of positive transgenic *Artemisia* using genomic DNA. M: marker; WT: wild type *Artemisia*, used as negative control; P: pHELLSGATE-iAaAPK1 plasmid, used as positive control. B: the artemisinin contents in AaAPK1-RNAi and wild type *Artemisia*. WT: wild-type *A. annua* plants. \*: significant difference at the level of  $p < 0.05$  given by t-test. Error bars represent  $\pm$ SD (n=3).

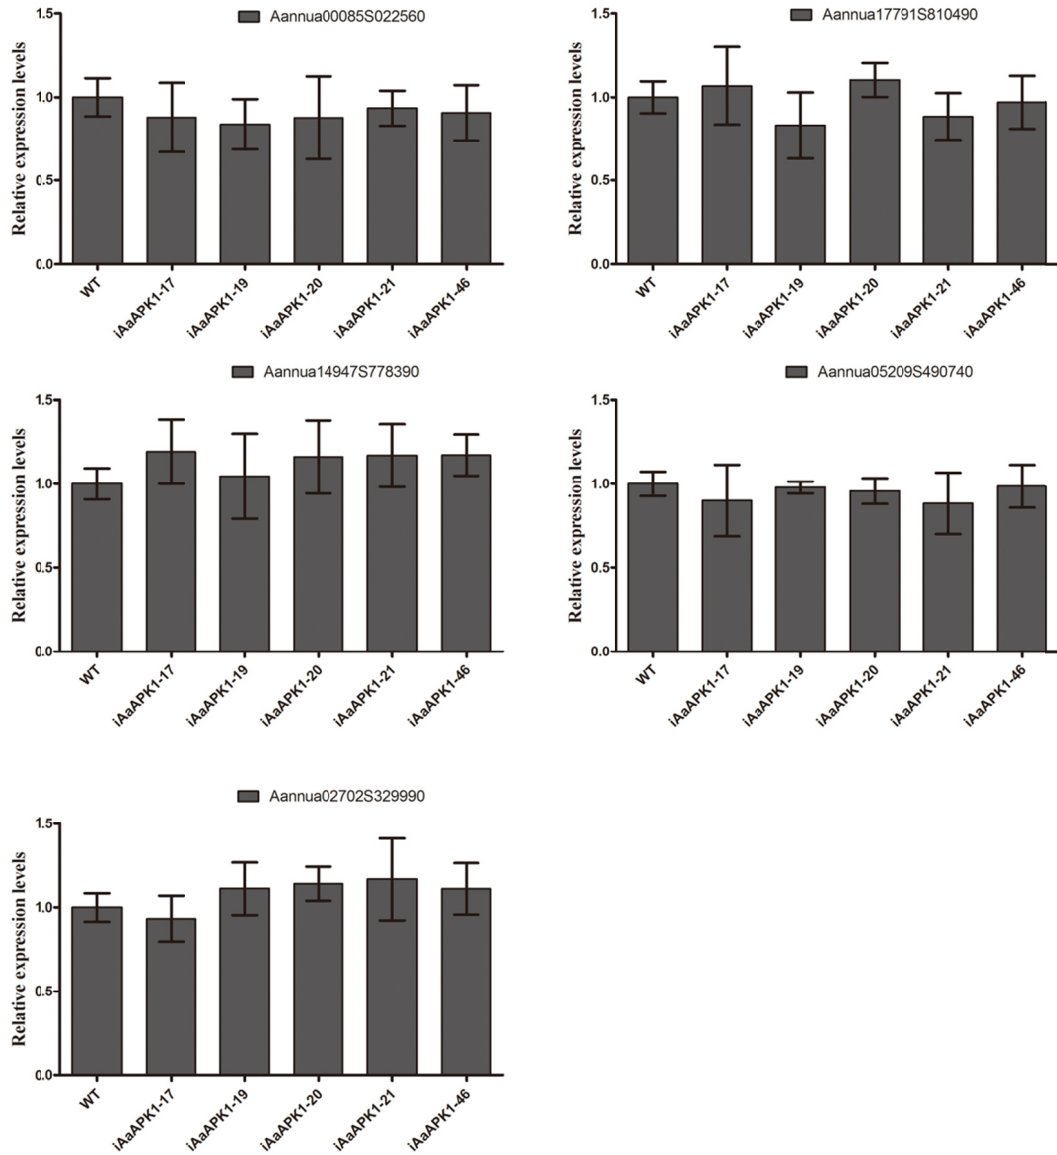

Fig. S7 The relative expression levels of *Aannua00085S022560*, *Aannua17791S810490*, *Aannua14947S778390*, *Aannua05209S490740* and *Aannua02702S329990* in AaAPK1-RNAi transgenic *Artemisia* and wild type *Artemisia*. WT: wild-type *A. annua* plants.
